# Supplementary material for: Antibiotic Misuse Behaviours of Older People: Confirmation of the Factor Structure of the Antibiotic Use Questionnaire
Source: MDPI journal article supplement (doi:10.3390/antibiotics12040718), 2023-04-06
Supplement: s1 [file s1]

Measure S1 – Antibiotic Use Questionnaire

**1. What is your age?**

\_\_\_\_\_

**2. What is your gender?**

- ☐ Male
- ☐ Female
- ☐ Other

**3. What is the highest level of education you have completed?**

- ☐ Primary School
- ☐ Secondary School, did not complete year 12
- ☐ Secondary School, completed year 12
- ☐ TAFE
- ☐ Bachelor's Degree
- ☐ Postgraduate Degree, i.e. Masters, PhD

**4. What is your post code?**

\_\_\_\_\_

**5. Are you trained in health-related fields?**

- ☐ Yes
- ☐ No

**6. Is there a healthcare worker in your family or friend group?**

- ☐ Yes
- ☐ No

**7. Antibiotics will reduce my cold symptoms**

- ☐ Strongly Disagree
- ☐ Disagree
- ☐ Agree
- ☐ Strongly Agree

**8. My friends and family follow recommendations for antibiotic use**

- ☐ Strongly Disagree
- ☐ Disagree
- ☐ Agree
- ☐ Strongly Agree

**9. Antibiotics are needed for the common cold**

- ☐ Strongly Disagree
- ☐ Disagree
- ☐ Agree
- ☐ Strongly Agree

**10. I am always courteous, even to people who are disagreeable**

- ☐ True
- ☐ False

**11. Antibiotics may have negative side effects**

- ☐ Strongly Disagree

- ☐ Disagree
- ☐ Agree
- ☐ Strongly Agree

**12. There have been times when I felt like rebelling against people in authority even though I knew they were right**

- ☐ True
- ☐ False

**13. I would take antibiotics without consulting a doctor**

- ☐ Strongly Disagree
- ☐ Disagree
- ☐ Agree
- ☐ Strongly Agree

**14. I use leftover or unused antibiotics or scripts**

- ☐ Strongly Disagree
- ☐ Disagree
- ☐ Agree
- ☐ Strongly Agree

**15. No matter who I'm talking to, I'm always a good listener**

- ☐ True
- ☐ False

**16. It is my right to ask for an antibiotic from my doctor**

- ☐ Strongly Disagree
- ☐ Disagree
- ☐ Agree
- ☐ Strongly Agree

**17. My friends and family only use antibiotics when prescribed**

- ☐ Strongly Disagree
- ☐ Disagree
- ☐ Agree
- ☐ Strongly Agree

**18. I'm always willing to admit it when I make a mistake**

- ☐ True
- ☐ False

**19. I know I need antibiotics before I see my doctor**

- ☐ Strongly Disagree
- ☐ Disagree
- ☐ Agree
- ☐ Strongly Agree

**20. In my community, it is common to use antibiotics without a prescription**

- ☐ Strongly Disagree
- ☐ Disagree
- ☐ Agree
- ☐ Strongly Agree

**21. I feel confident to ask for antibiotics when I need them**

- ☐ Strongly Disagree

- ☐ Disagree
- ☐ Agree
- ☐ Strongly Agree

**22. I have never deliberately said something that hurt someone's feelings**

- ☐ True
- ☐ False

**23. Antibiotics are less likely to work in the future**

- ☐ Strongly Disagree
- ☐ Disagree
- ☐ Agree
- ☐ Strongly Agree

**24. I consult with my doctor prior to taking antibiotics**

- ☐ Strongly Disagree
- ☐ Disagree
- ☐ Agree
- ☐ Strongly Agree

**25. There have been times when I was quite jealous of the good fortune of others**

- ☐ True
- ☐ False

**26. I keep leftover or unused antibiotics or scripts**

- ☐ Strongly Disagree
- ☐ Disagree
- ☐ Agree
- ☐ Strongly Agree

**27. I could easily get antibiotics from a doctor**

- ☐ Extremely Difficult
- ☐ Difficult
- ☐ Easy
- ☐ Extremely Easy

**28. I could easily get antibiotics online**

- ☐ Extremely Difficult
- ☐ Difficult
- ☐ Easy
- ☐ Extremely Easy

**29. I could easily get antibiotics from my family, a friend/household**

- ☐ Extremely Difficult
- ☐ Difficult
- ☐ Easy
- ☐ Extremely Easy

**30. By the time I am sick enough to see my doctor, I expect a prescription of antibiotics**

- ☐ Strongly Disagree
- ☐ Disagree
- ☐ Agree
- ☐ Strongly Agree
